# Supplementary material for: Methods for conducting a double-blind randomized controlled clinical trial of three days versus five days of amoxicillin dispersible tablets for chest indrawing childhood pneumonia among children two to 59 months of age in Lilongwe, Malawi: a study protocol
Source: PubMed Central journal article supplement (PMC6151015; doi:10.1186/s12879-018-3379-z), 2018-09-21
Supplement: 12879_2018_3379_MOESM1_ESM.pdf [file 12879_2018_3379_MOESM1_ESM.pdf]

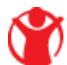

Participant Number

T 2 - -

Visit date

/ /

## Informed Consent

Staff initials: - -

Date and time of informed consent: / / : -

Consented at: 1 KCH 2 Bwila

## Vaccination, Vitamin A and Deworming History

Staff initials: - -

## At Birth

|          | Yes | No | Unknown | Date: |
|----------|-----|----|---------|-------|
| BCG:     | 1   | 2  | 99      | / /   |
| OPV (0): | 1   | 2  | 99      | / /   |

## 6 Weeks

|                   | Yes | No | Unknown | Date: |
|-------------------|-----|----|---------|-------|
| OPV (1):          | 1   | 2  | 99      | / /   |
| Pentavalent (1):  | 1   | 2  | 99      | / /   |
| Pneumococcal (1): | 1   | 2  | 99      | / /   |
| Rotavirus (1):    | 1   | 2  | 99      | / /   |

## 10 Weeks

66 Not Applicable

|                   | Yes | No | Unknown | Date: |
|-------------------|-----|----|---------|-------|
| OPV (2):          | 1   | 2  | 99      | / /   |
| Pentavalent (2):  | 1   | 2  | 99      | / /   |
| Pneumococcal (2): | 1   | 2  | 99      | / /   |
| Rotavirus (2):    | 1   | 2  | 99      | / /   |

## 14 Weeks

66 Not Applicable

|                   | Yes | No | Unknown | Date: |
|-------------------|-----|----|---------|-------|
| OPV (3):          | 1   | 2  | 99      | / /   |
| Pentavalent (3):  | 1   | 2  | 99      | / /   |
| Pneumococcal (3): | 1   | 2  | 99      | / /   |

## 9 Months

66 Not Applicable

|          | Yes | No | Unknown | Date: |
|----------|-----|----|---------|-------|
| Measles: | 1   | 2  | 99      | / /   |

## Additional Vaccinations

Any additional vaccination(s): 1 Yes 2 No 99 Unknown

Description: \_\_\_\_\_ Date: / /

Description: \_\_\_\_\_ Date: / /

Description: \_\_\_\_\_ Date: / /

Vitamin A supplement given in last 6 months: 1 Yes 2 No 99 Unknown 66 Not applicable

Date of last vitamin A: / /

Deworming done in last 6 months: 1 Yes 2 No 99 Unknown 66 Not applicable

Date of last deworming: / /

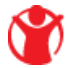

Participant Number

T 2 - [ ] - [ ]

**Socio-Demographics**

Staff initials: [ ] [ ] [ ]

Age of mother: [ ] [ ] years **OR** [99] UnknownMother`s highest level of education: [1] Primary [2] Secondary [3] Tertiary  
[4] None [99] UnknownFather`s highest level of education: [1] Primary [2] Secondary [3] Tertiary  
[4] None [99] UnknownParents` monthly income: MK [ ] [ ] [ ] [ ] [ ] [ ] **OR** [99] Unknown**Environmental Exposure**

Staff initials: [ ] [ ] [ ]

How many children aged 0-10 years (including study child) live in the same household: [ ] [ ] **OR** [99] Unknown

Does this child attend out of home care (nursery/preschool/family care/crèche)? [1] Yes [2] No [99] Unknown

Do any children in the home other than the child attend out of home care (nursery/preschool/family care/crèche)? [1] Yes [2] No [99] Unknown

Does anyone who lives in the same household as the child smoke cigarettes? [1] Yes [2] No [99] Unknown

What is the main source of drinking water?  
[1] Piped water (inside) [2] Piped water (outside)  
[3] Tube/Deep tube well [4] Surface well/other well  
[5] Surface water\* [6] Bottled/filtered water  
[55] Other; specify: \_\_\_\_\_  
[99] Unknown

In the last 24 hours, have you used soap and water to wash your hands? [1] Yes [2] No

Does this child sleep under a mosquito net? [1] Always [2] Usually [3] Sometimes  
[4] Never [99] Unknown

Is there cooking/heating that produces smoke in the household? [1] Yes [2] No [99] Unknown

Is anyone with active tuberculosis disease residing in or visiting the same household as the child? [1] Yes [2] No [99] Unknown

\* Pond/tank/lake/ river/stream

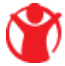

Participant Number

T 2 - [ ] - [ ]

Respondent Assessment

Staff initials: [ ]

Fast/difficult breathing:  Yes  No  Unknown

1

Chest-indrawing:  Yes  No  Unknown

2

Lethargy:  Yes  No  Unknown

3

Feeling cold to the touch:  Yes  No  Unknown

4

Poor feeding:  Yes  No  Unknown

5

Vomiting:  Yes  No  Unknown

6

Diarrhoea:  Yes  No  Unknown

7

If Yes; how many episodes: [ ] in [ ] days

8

Nasal blockage:  Yes  No  Unknown

9

Runny nose:  Yes  No  Unknown

10

Measles in the last 3 months:  Yes  No  Unknown

11

Currently breastfeeding:  Yes  No  Unknown

12

If Yes; exclusive breastfeeding:  Yes  
 No, complementary feeding started at [ ] months  
 Unknown  Not applicable

13

If No; was the child breastfed:  Yes, complementary feeding started at [ ] months  
 No  
 Unknown  Not applicable

14

Physical Examination

Staff initials: [ ]

Time of examination [ ] : [ ]

15

Respiratory rate: [ ] breaths/min Oxygen saturation [ ] %

16

Pulse rate: [ ] beats/min Axillary temperature: [ ] °C

17

Interviewer Details

Interviewer signature: \_\_\_\_\_ Date: [ ] / [ ] / [ ]

18

Staff initials: [ ]

19



Participant Number

T 2 - [ ] - [ ] [ ] [ ] [ ] [ ] [ ] [ ] [ ] [ ]

Visit date

[ ] [ ] / [ ] [ ] [ ] [ ] / [ ] [ ] [ ] [ ]

General Information

Staff initials: [ ] [ ] [ ] [ ]

Start time of visit: [ ] [ ] : [ ] [ ]

Follow-up location: [1] KCH inpatient [2] KCH outpatient [3] Home [55] Other; please specify: \_\_\_\_\_

Relationship of respondent: [1] Mother [2] Father [55] Other; please specify: \_\_\_\_\_

Adult respondent's statement - "Since the last visit the child is": [1] Improving [2] Not changed [3] Deteriorating [99] Unknown

Physical Examination

Staff initials: [ ] [ ] [ ] [ ]

Respiratory rate: [ ] [ ] breaths/min Oxygen saturation [ ] [ ] %

Pulse rate: [ ] [ ] beats/min Axillary temperature: [ ] [ ] . [ ] [ ] °C

Respondent Assessment

Staff initials: [ ] [ ] [ ] [ ]

Since the last visit, did the child have the following symptoms?

Fever: [1] Yes [2] No [99] Unknown

Cough: [1] Yes [2] No [99] Unknown

Fast/difficult breathing: [1] Yes [2] No [99] Unknown

Chest-indrawing: [1] Yes [2] No [99] Unknown

Lethargy: [1] Yes [2] No [99] Unknown

Feeling cold to the touch: [1] Yes [2] No [99] Unknown

Poor feeding: [1] Yes [2] No [99] Unknown

Vomiting: [1] Yes [2] No [99] Unknown

Diarrhoea: [1] Yes [2] No [99] Unknown

If Yes; how many episodes: [ ] [ ] in [ ] [ ] days

Nasal blockage: [1] Yes [2] No [99] Unknown

Runny nose: [1] Yes [2] No [99] Unknown



Participant Number

T 2 - [ ] - [ ] [ ] [ ] [ ] [ ] [ ] [ ] [ ] [ ]

Clinician Assessment

Staff initials: [ ] [ ] [ ] [ ]

Does the child currently have the following symptoms?

|                             |                                |                               |                                     |    |
|-----------------------------|--------------------------------|-------------------------------|-------------------------------------|----|
| Cough:                      | <input type="checkbox"/> 1 Yes | <input type="checkbox"/> 2 No | <input type="checkbox"/> 99 Unknown | 2  |
| Fast/difficult breathing:   | <input type="checkbox"/> 1 Yes | <input type="checkbox"/> 2 No | <input type="checkbox"/> 99 Unknown | 3  |
| Chest-indrawing:            | <input type="checkbox"/> 1 Yes | <input type="checkbox"/> 2 No | <input type="checkbox"/> 99 Unknown | 4  |
| Feeling cold to the touch*: | <input type="checkbox"/> 1 Yes | <input type="checkbox"/> 2 No | <input type="checkbox"/> 99 Unknown | 5  |
| Signs of dehydration*:      | <input type="checkbox"/> 1 Yes | <input type="checkbox"/> 2 No | <input type="checkbox"/> 99 Unknown | 6  |
| Poor feeding:               | <input type="checkbox"/> 1 Yes | <input type="checkbox"/> 2 No | <input type="checkbox"/> 99 Unknown | 7  |
| Diarrhoea:                  | <input type="checkbox"/> 1 Yes | <input type="checkbox"/> 2 No | <input type="checkbox"/> 99 Unknown | 8  |
| Nasal blockage:             | <input type="checkbox"/> 1 Yes | <input type="checkbox"/> 2 No | <input type="checkbox"/> 99 Unknown | 9  |
| Runny nose:                 | <input type="checkbox"/> 1 Yes | <input type="checkbox"/> 2 No | <input type="checkbox"/> 99 Unknown | 10 |

\* If not currently hospitalized, please refer to hospital for further evaluation

Danger Signs and Treatment Failure Criteria

Staff initials: [ ] [ ] [ ] [ ]

Danger Signs\*

|                           |                                          |                                                                  |                                                      |    |
|---------------------------|------------------------------------------|------------------------------------------------------------------|------------------------------------------------------|----|
| Convulsions:              | <input type="checkbox"/> 1 No convulsion | <input type="checkbox"/> 2 Reported convulsion (within 24 hours) | <input type="checkbox"/> 3 Observed convulsion (now) | 11 |
| Lethargic or unconscious: | <input type="checkbox"/> 1 Yes           | <input type="checkbox"/> 2 No                                    |                                                      | 12 |
| Unable to drink or feed:  | <input type="checkbox"/> 1 Yes           | <input type="checkbox"/> 2 No                                    |                                                      | 13 |
| Vomits everything:        | <input type="checkbox"/> 1 Yes           | <input type="checkbox"/> 2 No                                    |                                                      | 14 |
| Stridor in calm child:    | <input type="checkbox"/> 1 Yes           | <input type="checkbox"/> 2 No                                    |                                                      | 15 |

Respiratory Distress\*

|                         |                                |                               |  |    |
|-------------------------|--------------------------------|-------------------------------|--|----|
| Grunting:               | <input type="checkbox"/> 1 Yes | <input type="checkbox"/> 2 No |  | 16 |
| Nasal flaring:          | <input type="checkbox"/> 1 Yes | <input type="checkbox"/> 2 No |  | 17 |
| Head nodding:           | <input type="checkbox"/> 1 Yes | <input type="checkbox"/> 2 No |  | 18 |
| Severe chest-indrawing: | <input type="checkbox"/> 1 Yes | <input type="checkbox"/> 2 No |  | 19 |
| Other:                  | <input type="checkbox"/> 1 Yes | <input type="checkbox"/> 2 No |  | 20 |

If Other; specify: \_\_\_\_\_

\* If not currently hospitalized, please refer to hospital for further evaluation



Save the Children.

ITIP 2

VISIT 3

Day 2

Page No

12

Participant Number

T 2 - - - - -

**Danger Signs and Treatment Failure Criteria (Continued)**

**Other**

Hypoxia (SaO<sub>2</sub> <90%):  1 Yes  2 No

1

Missing 3 or more doses due to vomiting:  1 Yes  2 No

2

Change in antibiotics:  1 Yes  2 No

3

Death:  1 Yes  2 No

4

**Referral to Hospital**

Staff initials: - - -

If child is not in the hospital and required referral, was child referred?  1 Yes  2 No  3 In hospital  66 Not applicable

5

If No; specify: \_\_\_\_\_

6

**Interviewer Details**

Interviewer signature: \_\_\_\_\_ Date: - - / - - / - - - -

7

Staff initials: - - -

8

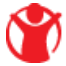

Participant Number

T 2 - - - - -

Visit date

/ / / / /

## General Information

Staff initials: - - - -

Start time of visit:

: : - -

Follow-up location:

 1 KCH inpatient  2 KCH outpatient  3 Home 55 Other; please specify: \_\_\_\_\_

Relationship of respondent:

 1 Mother  2 Father 55 Other; please specify: \_\_\_\_\_Adult respondent's statement -  
"Since the last visit the child  
is": 1 Improving  2 Not changed  3 Deteriorating 99 Unknown

## Physical Examination

Staff initials: - - - -

Respiratory rate:

- - - - breaths/min

Oxygen saturation

- - - - %

Pulse rate:

- - - - beats/min

Axillary temperature:

- - - - °C

## Respondent Assessment

Staff initials: - - - -

Since the last visit, did the child have the following symptoms?

Fever:

 1 Yes  2 No  99 Unknown

Cough:

 1 Yes  2 No  99 Unknown

Fast/difficult breathing:

 1 Yes  2 No  99 Unknown

Chest-indrawing:

 1 Yes  2 No  99 Unknown

Lethargy:

 1 Yes  2 No  99 Unknown

Feeling cold to the touch:

 1 Yes  2 No  99 Unknown

Poor feeding:

 1 Yes  2 No  99 Unknown

Vomiting:

 1 Yes  2 No  99 Unknown

Diarrhoea:

 1 Yes  2 No  99 Unknown

If Yes; how many episodes:

- - in - - days

Nasal blockage:

 1 Yes  2 No  99 Unknown

Runny nose:

 1 Yes  2 No  99 Unknown

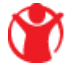

Participant Number

T 2 - [ ] - [ ] [ ] [ ] [ ] [ ] [ ] [ ] [ ] [ ]

Clinician Assessment

Staff initials: [ ] [ ] [ ] [ ]

Does the child currently have the following symptoms?

|                            |                                |                               |                                     |    |
|----------------------------|--------------------------------|-------------------------------|-------------------------------------|----|
| Cough:                     | <input type="checkbox"/> 1 Yes | <input type="checkbox"/> 2 No | <input type="checkbox"/> 99 Unknown | 2  |
| Fast/difficult breathing:  | <input type="checkbox"/> 1 Yes | <input type="checkbox"/> 2 No | <input type="checkbox"/> 99 Unknown | 3  |
| Chest-indrawing:           | <input type="checkbox"/> 1 Yes | <input type="checkbox"/> 2 No | <input type="checkbox"/> 99 Unknown | 4  |
| Feeling cold to the touch: | <input type="checkbox"/> 1 Yes | <input type="checkbox"/> 2 No | <input type="checkbox"/> 99 Unknown | 5  |
| Signs of dehydration:      | <input type="checkbox"/> 1 Yes | <input type="checkbox"/> 2 No | <input type="checkbox"/> 99 Unknown | 6  |
| Poor feeding:              | <input type="checkbox"/> 1 Yes | <input type="checkbox"/> 2 No | <input type="checkbox"/> 99 Unknown | 7  |
| Diarrhoea:                 | <input type="checkbox"/> 1 Yes | <input type="checkbox"/> 2 No | <input type="checkbox"/> 99 Unknown | 8  |
| Nasal blockage:            | <input type="checkbox"/> 1 Yes | <input type="checkbox"/> 2 No | <input type="checkbox"/> 99 Unknown | 9  |
| Runny nose:                | <input type="checkbox"/> 1 Yes | <input type="checkbox"/> 2 No | <input type="checkbox"/> 99 Unknown | 10 |

Danger Signs and Treatment Failure Criteria

Staff initials: [ ] [ ] [ ] [ ]

Danger Signs\*

|                           |                                                      |                                                                  |  |    |
|---------------------------|------------------------------------------------------|------------------------------------------------------------------|--|----|
| Convulsions:              | <input type="checkbox"/> 1 No convulsion             | <input type="checkbox"/> 2 Reported convulsion (within 24 hours) |  | 11 |
|                           | <input type="checkbox"/> 3 Observed convulsion (now) |                                                                  |  |    |
| Lethargic or unconscious: | <input type="checkbox"/> 1 Yes                       | <input type="checkbox"/> 2 No                                    |  | 12 |
| Unable to drink or feed:  | <input type="checkbox"/> 1 Yes                       | <input type="checkbox"/> 2 No                                    |  | 13 |
| Vomits everything:        | <input type="checkbox"/> 1 Yes                       | <input type="checkbox"/> 2 No                                    |  | 14 |
| Stridor in calm child:    | <input type="checkbox"/> 1 Yes                       | <input type="checkbox"/> 2 No                                    |  | 15 |

Respiratory Distress\*

|                         |                                |                               |  |    |
|-------------------------|--------------------------------|-------------------------------|--|----|
| Grunting:               | <input type="checkbox"/> 1 Yes | <input type="checkbox"/> 2 No |  | 16 |
| Nasal flaring:          | <input type="checkbox"/> 1 Yes | <input type="checkbox"/> 2 No |  | 17 |
| Head nodding:           | <input type="checkbox"/> 1 Yes | <input type="checkbox"/> 2 No |  | 18 |
| Severe chest-indrawing: | <input type="checkbox"/> 1 Yes | <input type="checkbox"/> 2 No |  | 19 |
| Other:                  | <input type="checkbox"/> 1 Yes | <input type="checkbox"/> 2 No |  | 20 |

If Other; specify: \_\_\_\_\_

\* If not currently hospitalized, please refer to hospital for further evaluation



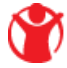

Participant Number

T 2 - [ ] - [ ] [ ] [ ] [ ] [ ] [ ] [ ] [ ] [ ]

Danger Signs and Treatment Failure Criteria (Continued)

Other

|                                                               |                                |                               |   |
|---------------------------------------------------------------|--------------------------------|-------------------------------|---|
| Hypoxia (SaO <sub>2</sub> <90%):                              | <input type="checkbox"/> 1 Yes | <input type="checkbox"/> 2 No | 1 |
| Missing 3 or more doses due to vomiting:                      | <input type="checkbox"/> 1 Yes | <input type="checkbox"/> 2 No | 2 |
| Change in antibiotics:                                        | <input type="checkbox"/> 1 Yes | <input type="checkbox"/> 2 No | 3 |
| Documented axillary temperature ≥ 38 °C with chest-indrawing: | <input type="checkbox"/> 1 Yes | <input type="checkbox"/> 2 No | 4 |
| Death:                                                        | <input type="checkbox"/> 1 Yes | <input type="checkbox"/> 2 No | 5 |

Referral to Hospital

Staff initials: [ ] [ ] [ ] [ ]

|                                                                            |                                |                               |                                        |                                            |   |
|----------------------------------------------------------------------------|--------------------------------|-------------------------------|----------------------------------------|--------------------------------------------|---|
| If child is not in the hospital and required referral, was child referred? | <input type="checkbox"/> 1 Yes | <input type="checkbox"/> 2 No | <input type="checkbox"/> 3 In hospital | <input type="checkbox"/> 66 Not applicable | 6 |
|----------------------------------------------------------------------------|--------------------------------|-------------------------------|----------------------------------------|--------------------------------------------|---|

If No; specify: \_\_\_\_\_

Interviewer Details

Interviewer signature: \_\_\_\_\_ Date: [ ] [ ] / [ ] [ ] [ ] [ ] / [ ] [ ] [ ] [ ]

Staff initials: [ ] [ ] [ ] [ ]



Participant Number

T 2 - [ ] - [ ]

Visit date

[ ]/[ ]/[ ]/[ ]/[ ]/[ ]/[ ]/[ ]/[ ]/[ ]/[ ]/[ ]

**General Information**

Staff initials: [ ] [ ] [ ]

Start time of visit:

[ ] [ ] : [ ] [ ]

Follow-up location:

 1 KCH inpatient  2 KCH outpatient  3 Home 55 Other; please specify: \_\_\_\_\_

Relationship of respondent:

 1 Mother  2 Father 55 Other; please specify: \_\_\_\_\_Adult respondent's statement -  
"Since the last visit the child  
is": 1 Improving  2 Not changed  3 Deteriorating 99 Unknown**Physical Examination**

Staff initials: [ ] [ ] [ ]

Respiratory rate:

[ ] [ ] [ ] breaths/min

Oxygen saturation

[ ] [ ] [ ] %

Pulse rate:

[ ] [ ] [ ] beats/min

Axillary temperature:

[ ] [ ] [ ] [ ] °C

**Respondent Assessment**

Staff initials: [ ] [ ] [ ]

Since the last visit, did the child have the following symptoms?

Fever:

 1 Yes  2 No  99 Unknown

Cough:

 1 Yes  2 No  99 Unknown

Fast/difficult breathing:

 1 Yes  2 No  99 Unknown

Chest-indrawing:

 1 Yes  2 No  99 Unknown

Lethargy:

 1 Yes  2 No  99 Unknown

Feeling cold to the touch:

 1 Yes  2 No  99 Unknown

Poor feeding:

 1 Yes  2 No  99 Unknown

Vomiting:

 1 Yes  2 No  99 Unknown

Diarrhoea:

 1 Yes  2 No  99 Unknown

If Yes; how many episodes:

[ ] [ ] in [ ] [ ] days

Nasal blockage:

 1 Yes  2 No  99 Unknown

Runny nose:

 1 Yes  2 No  99 Unknown



Participant Number

T 2 - [ ] - [ ] [ ] [ ] [ ] [ ] [ ] [ ] [ ]

**Clinician Assessment**

Staff initials: [ ] [ ] [ ]

Does the child currently have the following symptoms?

|                            |                                |                               |                                     |    |
|----------------------------|--------------------------------|-------------------------------|-------------------------------------|----|
| Cough:                     | <input type="checkbox"/> 1 Yes | <input type="checkbox"/> 2 No | <input type="checkbox"/> 99 Unknown | 2  |
| Fast/difficult breathing:  | <input type="checkbox"/> 1 Yes | <input type="checkbox"/> 2 No | <input type="checkbox"/> 99 Unknown | 3  |
| Chest-indrawing*:          | <input type="checkbox"/> 1 Yes | <input type="checkbox"/> 2 No | <input type="checkbox"/> 99 Unknown | 4  |
| Feeling cold to the touch: | <input type="checkbox"/> 1 Yes | <input type="checkbox"/> 2 No | <input type="checkbox"/> 99 Unknown | 5  |
| Signs of dehydration:      | <input type="checkbox"/> 1 Yes | <input type="checkbox"/> 2 No | <input type="checkbox"/> 99 Unknown | 6  |
| Poor feeding:              | <input type="checkbox"/> 1 Yes | <input type="checkbox"/> 2 No | <input type="checkbox"/> 99 Unknown | 7  |
| Diarrhoea:                 | <input type="checkbox"/> 1 Yes | <input type="checkbox"/> 2 No | <input type="checkbox"/> 99 Unknown | 8  |
| Nasal blockage:            | <input type="checkbox"/> 1 Yes | <input type="checkbox"/> 2 No | <input type="checkbox"/> 99 Unknown | 9  |
| Runny nose:                | <input type="checkbox"/> 1 Yes | <input type="checkbox"/> 2 No | <input type="checkbox"/> 99 Unknown | 10 |

\* If not currently hospitalized, please refer to hospital for further evaluation

**Danger Signs and Treatment Failure Criteria**

Staff initials: [ ] [ ] [ ]

**Danger Signs\***

|                           |                                          |                                                                  |                                                      |    |
|---------------------------|------------------------------------------|------------------------------------------------------------------|------------------------------------------------------|----|
| Convulsions:              | <input type="checkbox"/> 1 No convulsion | <input type="checkbox"/> 2 Reported convulsion (within 24 hours) | <input type="checkbox"/> 3 Observed convulsion (now) | 11 |
| Lethargic or unconscious: | <input type="checkbox"/> 1 Yes           | <input type="checkbox"/> 2 No                                    |                                                      | 12 |
| Unable to drink or feed:  | <input type="checkbox"/> 1 Yes           | <input type="checkbox"/> 2 No                                    |                                                      | 13 |
| Vomits everything:        | <input type="checkbox"/> 1 Yes           | <input type="checkbox"/> 2 No                                    |                                                      | 14 |
| Stridor in calm child:    | <input type="checkbox"/> 1 Yes           | <input type="checkbox"/> 2 No                                    |                                                      | 15 |

**Respiratory Distress\***

|                         |                                |                               |  |    |
|-------------------------|--------------------------------|-------------------------------|--|----|
| Grunting:               | <input type="checkbox"/> 1 Yes | <input type="checkbox"/> 2 No |  | 16 |
| Nasal flaring:          | <input type="checkbox"/> 1 Yes | <input type="checkbox"/> 2 No |  | 17 |
| Head nodding:           | <input type="checkbox"/> 1 Yes | <input type="checkbox"/> 2 No |  | 18 |
| Severe chest-indrawing: | <input type="checkbox"/> 1 Yes | <input type="checkbox"/> 2 No |  | 19 |
| Other:                  | <input type="checkbox"/> 1 Yes | <input type="checkbox"/> 2 No |  | 20 |

If Other; specify: \_\_\_\_\_

\* If not currently hospitalized, please refer to hospital for further evaluation

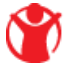

Save the Children.

ITIP 2

VISIT 5

DAY 6

Page No

18

Participant Number

T 2 - - - - -

**Danger Signs and Treatment Failure Criteria (Continued)**

**Other**

|                                          |                                |                               |   |
|------------------------------------------|--------------------------------|-------------------------------|---|
| Hypoxia (SaO <sub>2</sub> <90%):         | <input type="checkbox"/> 1 Yes | <input type="checkbox"/> 2 No | 1 |
| Missing 3 or more doses due to vomiting: | <input type="checkbox"/> 1 Yes | <input type="checkbox"/> 2 No | 2 |
| Change in antibiotics:                   | <input type="checkbox"/> 1 Yes | <input type="checkbox"/> 2 No | 3 |
| Persistence of chest-indrawing:          | <input type="checkbox"/> 1 Yes | <input type="checkbox"/> 2 No | 4 |
| Axillary temperature ≥ 38 °C:            | <input type="checkbox"/> 1 Yes | <input type="checkbox"/> 2 No | 5 |
| Death:                                   | <input type="checkbox"/> 1 Yes | <input type="checkbox"/> 2 No | 6 |

**Referral to Hospital**

Staff initials: - - - -

If child is not in the hospital and required referral, was child referred?  1 Yes  2 No  3 In hospital  66 Not applicable 7

If No; specify: \_\_\_\_\_ 8

**Interviewer Details**

Interviewer signature: \_\_\_\_\_ Date: - - / - - / - - - - 9  
 Staff initials: - - - - 10



Participant Number

T 2 - [ ] - [ ]

Visit date

[ ] / [ ] / [ ]

**General Information**

Staff initials: [ ] [ ] [ ]

Start time of visit:

[ ] [ ] : [ ] [ ]

Follow-up location:

 1 KCH inpatient     2 KCH outpatient     3 Home  
 55 Other; please specify: \_\_\_\_\_

Relationship of respondent:

 1 Mother     2 Father  
 55 Other; please specify: \_\_\_\_\_
Adult respondent's statement -  
"Since the last visit the child  
is":
 1 Improving     2 Not changed     3 Deteriorating  
 99 Unknown
**Physical Examination**

Staff initials: [ ] [ ] [ ]

Respiratory rate:

[ ] [ ] breaths/min

Oxygen saturation

[ ] [ ] %

Pulse rate:

[ ] [ ] beats/min

Axillary temperature:

[ ] [ ] . [ ] °C

**Respondent Assessment**

Staff initials: [ ] [ ] [ ]

Since the last visit, did the child have the following symptoms?

Fever:

 1 Yes     2 No     99 Unknown

Cough:

 1 Yes     2 No     99 Unknown

Fast/difficult breathing:

 1 Yes     2 No     99 Unknown

Chest-indrawing:

 1 Yes     2 No     99 Unknown

Lethargy:

 1 Yes     2 No     99 Unknown

Feeling cold to the touch:

 1 Yes     2 No     99 Unknown

Poor feeding:

 1 Yes     2 No     99 Unknown

Vomiting:

 1 Yes     2 No     99 Unknown

Diarrhoea:

 1 Yes     2 No     99 Unknown

If Yes; how many episodes: [ ] in [ ] days

Nasal blockage:

 1 Yes     2 No     99 Unknown

Runny nose:

 1 Yes     2 No     99 Unknown



Participant Number

T 2 - [ ] - [ ] [ ] [ ] [ ] [ ] [ ] [ ] [ ] [ ]

Clinician Assessment

Staff initials: [ ] [ ] [ ] [ ]

Does the child currently have the following symptoms?

|                            |                                |                               |                                     |    |
|----------------------------|--------------------------------|-------------------------------|-------------------------------------|----|
| Cough:                     | <input type="checkbox"/> 1 Yes | <input type="checkbox"/> 2 No | <input type="checkbox"/> 99 Unknown | 2  |
| Fast/difficult breathing:  | <input type="checkbox"/> 1 Yes | <input type="checkbox"/> 2 No | <input type="checkbox"/> 99 Unknown | 3  |
| Chest-indrawing*:          | <input type="checkbox"/> 1 Yes | <input type="checkbox"/> 2 No | <input type="checkbox"/> 99 Unknown | 4  |
| Feeling cold to the touch: | <input type="checkbox"/> 1 Yes | <input type="checkbox"/> 2 No | <input type="checkbox"/> 99 Unknown | 5  |
| Signs of dehydration:      | <input type="checkbox"/> 1 Yes | <input type="checkbox"/> 2 No | <input type="checkbox"/> 99 Unknown | 6  |
| Poor feeding:              | <input type="checkbox"/> 1 Yes | <input type="checkbox"/> 2 No | <input type="checkbox"/> 99 Unknown | 7  |
| Diarrhoea:                 | <input type="checkbox"/> 1 Yes | <input type="checkbox"/> 2 No | <input type="checkbox"/> 99 Unknown | 8  |
| Nasal blockage:            | <input type="checkbox"/> 1 Yes | <input type="checkbox"/> 2 No | <input type="checkbox"/> 99 Unknown | 9  |
| Runny nose:                | <input type="checkbox"/> 1 Yes | <input type="checkbox"/> 2 No | <input type="checkbox"/> 99 Unknown | 10 |

\* If not currently hospitalized, please refer to hospital for further evaluation

Clinical Relapse Criteria

Staff initials: [ ] [ ] [ ] [ ]

Danger Signs\*

|                           |                                          |                                                                  |                                                      |    |
|---------------------------|------------------------------------------|------------------------------------------------------------------|------------------------------------------------------|----|
| Convulsions:              | <input type="checkbox"/> 1 No convulsion | <input type="checkbox"/> 2 Reported convulsion (within 24 hours) | <input type="checkbox"/> 3 Observed convulsion (now) | 11 |
| Lethargic or unconscious: | <input type="checkbox"/> 1 Yes           | <input type="checkbox"/> 2 No                                    |                                                      | 12 |
| Unable to drink or feed:  | <input type="checkbox"/> 1 Yes           | <input type="checkbox"/> 2 No                                    |                                                      | 13 |
| Vomits everything:        | <input type="checkbox"/> 1 Yes           | <input type="checkbox"/> 2 No                                    |                                                      | 14 |

Respiratory Distress\*

|                         |                                |                               |  |    |
|-------------------------|--------------------------------|-------------------------------|--|----|
| Grunting:               | <input type="checkbox"/> 1 Yes | <input type="checkbox"/> 2 No |  | 15 |
| Nasal flaring:          | <input type="checkbox"/> 1 Yes | <input type="checkbox"/> 2 No |  | 16 |
| Head nodding:           | <input type="checkbox"/> 1 Yes | <input type="checkbox"/> 2 No |  | 17 |
| Severe chest-indrawing: | <input type="checkbox"/> 1 Yes | <input type="checkbox"/> 2 No |  | 18 |
| Other:                  | <input type="checkbox"/> 1 Yes | <input type="checkbox"/> 2 No |  | 19 |

If Other; specify: \_\_\_\_\_



Participant Number

T 2 - [ ] - [ ]

**Clinical Relapse Criteria (Continued)****Other**Hypoxia (SaO<sub>2</sub> <90%):  Yes  NoFever (Axillary temperature ≥ 38 °C):  Yes  NoRecurrence of signs of chest-indrawing pneumonia:  Yes  NoOther severe disease:  Yes  No

If Yes; specify: \_\_\_\_\_

Death:  Yes  No

\* If not currently hospitalized, please refer to hospital for further evaluation

**Referral to Hospital**

Staff initials: [ ]

If child is not in the hospital and required referral, was child referred?  Yes  No  In hospital  Not applicable

If No; specify: \_\_\_\_\_

**Clinical Outcome**

Staff initials: [ ]

|                                                |                                                                            |
|------------------------------------------------|----------------------------------------------------------------------------|
| Clinical outcome after 14 days from diagnosis: | <input type="checkbox"/> Clinically cured                                  |
|                                                | <input type="checkbox"/> Failed initial antibiotic treatment regimen       |
|                                                | <input type="checkbox"/> Did not fail initial antibiotic treatment regimen |
|                                                | <input type="checkbox"/> Not cured                                         |
|                                                | <input type="checkbox"/> Improving                                         |
|                                                | <input type="checkbox"/> Deteriorating                                     |
|                                                | <input type="checkbox"/> Stable (Prognosis unclear)                        |
|                                                | <input type="checkbox"/> Other; please specify: _____                      |

**Interviewer Details**

Interviewer signature: \_\_\_\_\_ Date: [ ]/[ ]/[ ]

Staff initials: [ ]

**Study Product Log**

Staff initials: [ ][ ]

 First dose administered by:  1 Study staff  2 KCH staff  3 Caregiver

First dose administered at: [ ][ ] : [ ][ ]

Randomization number: R [ ][ ] - [ ][ ][ ][ ] - [ ][ ] Pharmacist: [ ][ ] Verified by: [ ][ ]

Number of tablets dispensed at enrolment: [ ][ ]

| Day | Treatment number | Dose <b>successfully</b> <sup>§</sup> administered |                                     |                                     | Number of <b>doses</b> <sup>#</sup> attempted | Reason dose not administered: | Did the child vomit within 30 minutes of a dose? |                                     |                                     |                                     | Number of <b>doses</b> <sup>#</sup> where child vomited within 30 minutes | Docu-mented by: |
|-----|------------------|----------------------------------------------------|-------------------------------------|-------------------------------------|-----------------------------------------------|-------------------------------|--------------------------------------------------|-------------------------------------|-------------------------------------|-------------------------------------|---------------------------------------------------------------------------|-----------------|
|     |                  | Yes                                                | No                                  | Unknown                             |                                               |                               | Yes                                              | No                                  | Un-known                            | N/A                                 |                                                                           |                 |
| 1   | 1                | <input checked="" type="checkbox"/>                | <input checked="" type="checkbox"/> | <input checked="" type="checkbox"/> | <input type="checkbox"/> 66 N/A               |                               | <input checked="" type="checkbox"/>              | <input checked="" type="checkbox"/> | <input checked="" type="checkbox"/> | <input checked="" type="checkbox"/> | <input type="checkbox"/> 66 N/A                                           | [ ][ ]          |
|     | 2                | <input checked="" type="checkbox"/>                | <input checked="" type="checkbox"/> | <input checked="" type="checkbox"/> | <input type="checkbox"/> 66 N/A               |                               | <input checked="" type="checkbox"/>              | <input checked="" type="checkbox"/> | <input checked="" type="checkbox"/> | <input checked="" type="checkbox"/> | <input type="checkbox"/> 66 N/A                                           | [ ][ ]          |
| 2   | 1                | <input checked="" type="checkbox"/>                | <input checked="" type="checkbox"/> | <input checked="" type="checkbox"/> | <input type="checkbox"/> 66 N/A               |                               | <input checked="" type="checkbox"/>              | <input checked="" type="checkbox"/> | <input checked="" type="checkbox"/> | <input checked="" type="checkbox"/> | <input type="checkbox"/> 66 N/A                                           | [ ][ ]          |
|     | 2                | <input checked="" type="checkbox"/>                | <input checked="" type="checkbox"/> | <input checked="" type="checkbox"/> | <input type="checkbox"/> 66 N/A               |                               | <input checked="" type="checkbox"/>              | <input checked="" type="checkbox"/> | <input checked="" type="checkbox"/> | <input checked="" type="checkbox"/> | <input type="checkbox"/> 66 N/A                                           | [ ][ ]          |
| 3   | 1                | <input checked="" type="checkbox"/>                | <input checked="" type="checkbox"/> | <input checked="" type="checkbox"/> | <input type="checkbox"/> 66 N/A               |                               | <input checked="" type="checkbox"/>              | <input checked="" type="checkbox"/> | <input checked="" type="checkbox"/> | <input checked="" type="checkbox"/> | <input type="checkbox"/> 66 N/A                                           | [ ][ ]          |
|     | 2                | <input checked="" type="checkbox"/>                | <input checked="" type="checkbox"/> | <input checked="" type="checkbox"/> | <input type="checkbox"/> 66 N/A               |                               | <input checked="" type="checkbox"/>              | <input checked="" type="checkbox"/> | <input checked="" type="checkbox"/> | <input checked="" type="checkbox"/> | <input type="checkbox"/> 66 N/A                                           | [ ][ ]          |
| 4   | 1                | <input checked="" type="checkbox"/>                | <input checked="" type="checkbox"/> | <input checked="" type="checkbox"/> | <input type="checkbox"/> 66 N/A               |                               | <input checked="" type="checkbox"/>              | <input checked="" type="checkbox"/> | <input checked="" type="checkbox"/> | <input checked="" type="checkbox"/> | <input type="checkbox"/> 66 N/A                                           | [ ][ ]          |
|     | 2                | <input checked="" type="checkbox"/>                | <input checked="" type="checkbox"/> | <input checked="" type="checkbox"/> | <input type="checkbox"/> 66 N/A               |                               | <input checked="" type="checkbox"/>              | <input checked="" type="checkbox"/> | <input checked="" type="checkbox"/> | <input checked="" type="checkbox"/> | <input type="checkbox"/> 66 N/A                                           | [ ][ ]          |
| 5   | 1                | <input checked="" type="checkbox"/>                | <input checked="" type="checkbox"/> | <input checked="" type="checkbox"/> | <input type="checkbox"/> 66 N/A               |                               | <input checked="" type="checkbox"/>              | <input checked="" type="checkbox"/> | <input checked="" type="checkbox"/> | <input checked="" type="checkbox"/> | <input type="checkbox"/> 66 N/A                                           | [ ][ ]          |
|     | 2                | <input checked="" type="checkbox"/>                | <input checked="" type="checkbox"/> | <input checked="" type="checkbox"/> | <input type="checkbox"/> 66 N/A               |                               | <input checked="" type="checkbox"/>              | <input checked="" type="checkbox"/> | <input checked="" type="checkbox"/> | <input checked="" type="checkbox"/> | <input type="checkbox"/> 66 N/A                                           | [ ][ ]          |

 Number of replacement tablets dispensed: [ ][ ] on [ ][ ] / [ ][ ][ ][ ] / [ ][ ][ ][ ][ ][ ]  66 Not applicable Pharmacist: [ ][ ]

 Number of replacement tablets dispensed: [ ][ ] on [ ][ ] / [ ][ ][ ][ ] / [ ][ ][ ][ ][ ][ ]  66 Not applicable Pharmacist: [ ][ ]

 Number of tablets returned: [ ][ ]  99 Unknown  66 Not applicable Clinic staff: [ ][ ] Pharmacist: [ ][ ]

 All blister packs returned?  1 Yes  2 No

Reason why study product not returned: \_\_\_\_\_

<sup>§</sup> Successful administration includes doses that were swallowed, but where vomiting occurred afterwards

<sup>#</sup> Please record the number of the doses, **NOT** the number of tablets



| <b>Hospitalization Log</b> |                                                                  |                                                                                        |                                                                                                                 | Staff initials: [ ] [ ] |
|----------------------------|------------------------------------------------------------------|----------------------------------------------------------------------------------------|-----------------------------------------------------------------------------------------------------------------|-------------------------|
| No                         | Admission date and time                                          | Discharge date and time                                                                | Reason for admission                                                                                            | * Specify               |
| 1                          | [ ] [ ] / [ ] [ ] [ ] [ ] / [ ] [ ] [ ] [ ]<br>[ ] [ ] : [ ] [ ] | [ ] [ ] / [ ] [ ] [ ] [ ] / [ ] [ ] [ ] [ ]<br>[ ] [ ] : [ ] [ ] <b>OR</b> [ ] Ongoing | [ ] Protocol specified [ ] Severe pneumonia [ ] Malaria<br>[ ] Severe diarrhoea [ ] WHO danger sign* [ ] Other* |                         |
| 2                          | [ ] [ ] / [ ] [ ] [ ] [ ] / [ ] [ ] [ ] [ ]<br>[ ] [ ] : [ ] [ ] | [ ] [ ] / [ ] [ ] [ ] [ ] / [ ] [ ] [ ] [ ]<br>[ ] [ ] : [ ] [ ] <b>OR</b> [ ] Ongoing | [ ] Protocol specified [ ] Severe pneumonia [ ] Malaria<br>[ ] Severe diarrhoea [ ] WHO danger sign* [ ] Other* |                         |
| 3                          | [ ] [ ] / [ ] [ ] [ ] [ ] / [ ] [ ] [ ] [ ]<br>[ ] [ ] : [ ] [ ] | [ ] [ ] / [ ] [ ] [ ] [ ] / [ ] [ ] [ ] [ ]<br>[ ] [ ] : [ ] [ ] <b>OR</b> [ ] Ongoing | [ ] Protocol specified [ ] Severe pneumonia [ ] Malaria<br>[ ] Severe diarrhoea [ ] WHO danger sign* [ ] Other* |                         |
| 4                          | [ ] [ ] / [ ] [ ] [ ] [ ] / [ ] [ ] [ ] [ ]<br>[ ] [ ] : [ ] [ ] | [ ] [ ] / [ ] [ ] [ ] [ ] / [ ] [ ] [ ] [ ]<br>[ ] [ ] : [ ] [ ] <b>OR</b> [ ] Ongoing | [ ] Protocol specified [ ] Severe pneumonia [ ] Malaria<br>[ ] Severe diarrhoea [ ] WHO danger sign* [ ] Other* |                         |
| 5                          | [ ] [ ] / [ ] [ ] [ ] [ ] / [ ] [ ] [ ] [ ]<br>[ ] [ ] : [ ] [ ] | [ ] [ ] / [ ] [ ] [ ] [ ] / [ ] [ ] [ ] [ ]<br>[ ] [ ] : [ ] [ ] <b>OR</b> [ ] Ongoing | [ ] Protocol specified [ ] Severe pneumonia [ ] Malaria<br>[ ] Severe diarrhoea [ ] WHO danger sign* [ ] Other* |                         |
| 6                          | [ ] [ ] / [ ] [ ] [ ] [ ] / [ ] [ ] [ ] [ ]<br>[ ] [ ] : [ ] [ ] | [ ] [ ] / [ ] [ ] [ ] [ ] / [ ] [ ] [ ] [ ]<br>[ ] [ ] : [ ] [ ] <b>OR</b> [ ] Ongoing | [ ] Protocol specified [ ] Severe pneumonia [ ] Malaria<br>[ ] Severe diarrhoea [ ] WHO danger sign* [ ] Other* |                         |
| 7                          | [ ] [ ] / [ ] [ ] [ ] [ ] / [ ] [ ] [ ] [ ]<br>[ ] [ ] : [ ] [ ] | [ ] [ ] / [ ] [ ] [ ] [ ] / [ ] [ ] [ ] [ ]<br>[ ] [ ] : [ ] [ ] <b>OR</b> [ ] Ongoing | [ ] Protocol specified [ ] Severe pneumonia [ ] Malaria<br>[ ] Severe diarrhoea [ ] WHO danger sign* [ ] Other* |                         |
| 8                          | [ ] [ ] / [ ] [ ] [ ] [ ] / [ ] [ ] [ ] [ ]<br>[ ] [ ] : [ ] [ ] | [ ] [ ] / [ ] [ ] [ ] [ ] / [ ] [ ] [ ] [ ]<br>[ ] [ ] : [ ] [ ] <b>OR</b> [ ] Ongoing | [ ] Protocol specified [ ] Severe pneumonia [ ] Malaria<br>[ ] Severe diarrhoea [ ] WHO danger sign* [ ] Other* |                         |
| 9                          | [ ] [ ] / [ ] [ ] [ ] [ ] / [ ] [ ] [ ] [ ]<br>[ ] [ ] : [ ] [ ] | [ ] [ ] / [ ] [ ] [ ] [ ] / [ ] [ ] [ ] [ ]<br>[ ] [ ] : [ ] [ ] <b>OR</b> [ ] Ongoing | [ ] Protocol specified [ ] Severe pneumonia [ ] Malaria<br>[ ] Severe diarrhoea [ ] WHO danger sign* [ ] Other* |                         |
| 10                         | [ ] [ ] / [ ] [ ] [ ] [ ] / [ ] [ ] [ ] [ ]<br>[ ] [ ] : [ ] [ ] | [ ] [ ] / [ ] [ ] [ ] [ ] / [ ] [ ] [ ] [ ]<br>[ ] [ ] : [ ] [ ] <b>OR</b> [ ] Ongoing | [ ] Protocol specified [ ] Severe pneumonia [ ] Malaria<br>[ ] Severe diarrhoea [ ] WHO danger sign* [ ] Other* |                         |

**Adverse Events** Staff initials: [ ] [ ] [ ]

 Did the child experience any adverse events during the study?  1 Yes  2 No

If "Yes"; please record details of all adverse events below (using one line per event):

| No | Adverse event description | Start Date                                          | Stop Date                                                                                                        | Outcome <sup>a</sup> | Therapy <sup>b</sup><br>(List all that apply) | Relation-ship <sup>c</sup> | DAIDS Grading <sup>d</sup> | Serious-ness <sup>e</sup> |
|----|---------------------------|-----------------------------------------------------|------------------------------------------------------------------------------------------------------------------|----------------------|-----------------------------------------------|----------------------------|----------------------------|---------------------------|
| 1  |                           | [ ] [ ] / [ ] [ ] [ ] [ ] / [ ] [ ] [ ] [ ] [ ] [ ] | [ ] [ ] / [ ] [ ] [ ] [ ] / [ ] [ ] [ ] [ ] [ ] [ ]<br><b>OR</b> <input type="checkbox"/> 1 Ongoing <sup>f</sup> |                      | *Specify: _____<br>_____                      |                            |                            |                           |
| 2  |                           | [ ] [ ] / [ ] [ ] [ ] [ ] / [ ] [ ] [ ] [ ] [ ] [ ] | [ ] [ ] / [ ] [ ] [ ] [ ] / [ ] [ ] [ ] [ ] [ ] [ ]<br><b>OR</b> <input type="checkbox"/> 1 Ongoing <sup>f</sup> |                      | *Specify: _____<br>_____                      |                            |                            |                           |
| 3  |                           | [ ] [ ] / [ ] [ ] [ ] [ ] / [ ] [ ] [ ] [ ] [ ] [ ] | [ ] [ ] / [ ] [ ] [ ] [ ] / [ ] [ ] [ ] [ ] [ ] [ ]<br><b>OR</b> <input type="checkbox"/> 1 Ongoing <sup>f</sup> |                      | *Specify: _____<br>_____                      |                            |                            |                           |
| 4  |                           | [ ] [ ] / [ ] [ ] [ ] [ ] / [ ] [ ] [ ] [ ] [ ] [ ] | [ ] [ ] / [ ] [ ] [ ] [ ] / [ ] [ ] [ ] [ ] [ ] [ ]<br><b>OR</b> <input type="checkbox"/> 1 Ongoing <sup>f</sup> |                      | *Specify: _____<br>_____                      |                            |                            |                           |

|                                                                                                              |                                                                                                                                              |                                                                                                                                        |                                                                                                                       |                                                                                                                                                                                                                                     |
|--------------------------------------------------------------------------------------------------------------|----------------------------------------------------------------------------------------------------------------------------------------------|----------------------------------------------------------------------------------------------------------------------------------------|-----------------------------------------------------------------------------------------------------------------------|-------------------------------------------------------------------------------------------------------------------------------------------------------------------------------------------------------------------------------------|
| <b><sup>a</sup>Outcome:</b><br>1. Resolved<br>2. Continuing<br>3. Death<br>66. Not applicable<br>99. Unknown | <b><sup>b</sup>Therapy:</b><br>1. None<br>2. Antibiotics<br>3. Drug, other than antibiotics<br>55. Other*<br>99. Unknown<br>(All that apply) | <b><sup>c</sup>Relationship:</b><br>1. Certain<br>2. Probable<br>3. Possible<br>4. Probably not<br>5. Not related<br>6. Not assessable | <b><sup>d</sup>DAIDS Grading:</b><br>0. Grade 0<br>1. Grade 1<br>2. Grade 2<br>3. Grade 3<br>4. Grade 4<br>5. Grade 5 | <b><sup>e</sup>Seriousness:</b><br>1. Not serious<br>2. Life-threatening<br>3. Persistent disability or incapacity<br>4. Hospitalization or prolongation of hospitalization<br>5. Death<br>6. Congenital anomalies of birth defects |
|--------------------------------------------------------------------------------------------------------------|----------------------------------------------------------------------------------------------------------------------------------------------|----------------------------------------------------------------------------------------------------------------------------------------|-----------------------------------------------------------------------------------------------------------------------|-------------------------------------------------------------------------------------------------------------------------------------------------------------------------------------------------------------------------------------|

<sup>f</sup> Ongoing at study exit

 Is this the last adverse events page?  1 Yes  2 No

Is this the last adverse events page?

1 Yes

2 No

**Concomitant Antibiotics** Staff initials: [ ][ ] [ ][ ]

 Did the child take any concomitant antibiotics during the study period (from screening to the conclusion of participation)?  Yes  No

If "Yes"; please record details below (using one line per medication):

| No | Medication <sup>a</sup> | Formulation <sup>c</sup> | Total daily dose | Route <sup>b</sup> | Start Date                                | Stop Date                                                                        | Indication |
|----|-------------------------|--------------------------|------------------|--------------------|-------------------------------------------|----------------------------------------------------------------------------------|------------|
| 1  |                         |                          |                  |                    | [ ][ ][ ]/[ ][ ][ ][ ]/[ ][ ][ ][ ][ ][ ] | [ ][ ][ ]/[ ][ ][ ][ ]/[ ][ ][ ][ ][ ][ ]<br>OR <input type="checkbox"/> Ongoing |            |
| 2  |                         |                          |                  |                    | [ ][ ][ ]/[ ][ ][ ][ ]/[ ][ ][ ][ ][ ][ ] | [ ][ ][ ]/[ ][ ][ ][ ]/[ ][ ][ ][ ][ ][ ]<br>OR <input type="checkbox"/> Ongoing |            |
| 3  |                         |                          |                  |                    | [ ][ ][ ]/[ ][ ][ ][ ]/[ ][ ][ ][ ][ ][ ] | [ ][ ][ ]/[ ][ ][ ][ ]/[ ][ ][ ][ ][ ][ ]<br>OR <input type="checkbox"/> Ongoing |            |
| 4  |                         |                          |                  |                    | [ ][ ][ ]/[ ][ ][ ][ ]/[ ][ ][ ][ ][ ][ ] | [ ][ ][ ]/[ ][ ][ ][ ]/[ ][ ][ ][ ][ ][ ]<br>OR <input type="checkbox"/> Ongoing |            |
| 5  |                         |                          |                  |                    | [ ][ ][ ]/[ ][ ][ ][ ]/[ ][ ][ ][ ][ ][ ] | [ ][ ][ ]/[ ][ ][ ][ ]/[ ][ ][ ][ ][ ][ ]<br>OR <input type="checkbox"/> Ongoing |            |

<sup>a</sup> Please use generic names for all products with a single active ingredient, and trade names for all combination products.

<sup>b</sup> **Route of Administration:**

|                |                  |                         |                           |
|----------------|------------------|-------------------------|---------------------------|
| 1. Topical     | 4. Intramuscular | 7. Intranasal           | 10. Into conjunctival sac |
| 2. Oral        | 5. Intravenous   | 8. Inhaled              | 11. Per vagina            |
| 3. Per rectum. | 6. Subcutaneous  | 9. Into auditory meatus | 55. Other                 |

<sup>c</sup> **Formulation:**

|                     |               |               |                 |
|---------------------|---------------|---------------|-----------------|
| 1. Tablet           | 4. Injectable | 7. Drops      | 10. Suppository |
| 2. Capsule          | 5. Cream      | 8. Spray      | 55. Other       |
| 3. Suspension/Syrup | 6. Gel        | 9. Inhalation |                 |

 Is this the last concomitant antibiotics page?  Yes  No

**Prior and Concomitant Medications**

 Staff initials: 

 Did the child take any medication prior to enrolment (48hrs) or any concomitant medication during the study period (from screening to the conclusion of participation)?  Yes  No

If "Yes"; please record details below (using one line per medication):

| No | Medication <sup>a</sup> | Formulation <sup>c</sup> | Total daily dose | Route <sup>b</sup> | Start Date           | Stop Date                                                          | Indication |
|----|-------------------------|--------------------------|------------------|--------------------|----------------------|--------------------------------------------------------------------|------------|
| 1  |                         |                          |                  |                    | <input type="text"/> | <input type="text"/><br><b>OR</b> <input type="checkbox"/> Ongoing |            |
| 2  |                         |                          |                  |                    | <input type="text"/> | <input type="text"/><br><b>OR</b> <input type="checkbox"/> Ongoing |            |
| 3  |                         |                          |                  |                    | <input type="text"/> | <input type="text"/><br><b>OR</b> <input type="checkbox"/> Ongoing |            |
| 4  |                         |                          |                  |                    | <input type="text"/> | <input type="text"/><br><b>OR</b> <input type="checkbox"/> Ongoing |            |
| 5  |                         |                          |                  |                    | <input type="text"/> | <input type="text"/><br><b>OR</b> <input type="checkbox"/> Ongoing |            |

<sup>a</sup> Please use generic names for all products with a single active ingredient, and trade names for all combination products.

<sup>b</sup> **Route of Administration:**

- |                |                  |                         |                           |
|----------------|------------------|-------------------------|---------------------------|
| 1. Topical     | 4. Intramuscular | 7. Intranasal           | 10. Into conjunctival sac |
| 2. Oral        | 5. Intravenous   | 8. Inhaled              | 11. Per vagina            |
| 3. Per rectum. | 6. Subcutaneous  | 9. Into auditory meatus | 55. Other                 |

<sup>c</sup> **Formulation:**

- |                     |               |               |                 |
|---------------------|---------------|---------------|-----------------|
| 1. Tablet           | 4. Injectable | 7. Drops      | 10. Suppository |
| 2. Capsule          | 5. Cream      | 8. Spray      | 55. Other       |
| 3. Suspension/Syrup | 6. Gel        | 9. Inhalation |                 |

Is this the last concomitant medications page?

 Yes  No

**Explanatory Notes**  Not applicable Staff initials: 

| No | Page | Comment | Initials |
|----|------|---------|----------|
| 1  |      |         |          |
| 2  |      |         |          |
| 3  |      |         |          |
| 4  |      |         |          |
| 5  |      |         |          |

**Missing Data**  Not applicable Staff initials: 

| No | Page | Missing data | Reason | Initials |
|----|------|--------------|--------|----------|
| 1  |      |              |        |          |
| 2  |      |              |        |          |
| 3  |      |              |        |          |
| 4  |      |              |        |          |
| 5  |      |              |        |          |

Is this the last explanatory notes and missing data page?

 Yes

 No



Participant Number

T 2 - [ ] - [ ]

Conclusion of Participation

Staff initials: [ ] [ ] [ ] [ ]

Date of Conclusion of Participation: [ ] [ ] / [ ] [ ] / [ ] [ ] [ ] [ ]

Child's status upon trial termination:  1 Completed  2 Drop-out

If "Drop-out", specify the primary reason for premature discontinuation from trial below (tick only one box):

- 1 Adverse event  2 Protocol non-compliance
- 3 Lost to follow-up  4 Death
- 5 Consent withdrawn  6 Sponsor decision
- 55 Other, specify: \_\_\_\_\_

Was the child referred to continued care?  1 Yes  2 No

If Yes; describe referral: \_\_\_\_\_

Is the participation in the study noted in the child's health passport?  1 Yes  2 No

If No; please comment: \_\_\_\_\_

Checklist

Staff initials: [ ] [ ] [ ] [ ]

| Section                                          |                                            | Number of pages/visits |
|--------------------------------------------------|--------------------------------------------|------------------------|
| Unscheduled Visit (prior to Day 6)               | <input type="checkbox"/> 66 Not applicable |                        |
| Unscheduled Visit (post Day 6)                   | <input type="checkbox"/> 66 Not applicable |                        |
| Additional Adverse Events                        | <input type="checkbox"/> 66 Not applicable |                        |
| Additional Concomitant Antibiotics               | <input type="checkbox"/> 66 Not applicable |                        |
| Additional Concomitant Medications               | <input type="checkbox"/> 66 Not applicable |                        |
| Additional Explanatory Notes and/or Missing Data | <input type="checkbox"/> 66 Not applicable |                        |
| Non-Compliance                                   | <input type="checkbox"/> 66 Not applicable |                        |

Clinician Declaration

The information contained on this and the preceding pages, including the results of tests and evaluations performed, accurately reflects the medical records of this child.

Clinician signature: \_\_\_\_\_ Date: [ ] [ ] / [ ] [ ] / [ ] [ ] [ ] [ ]

Staff initials: [ ] [ ] [ ] [ ]
